# Supplementary material for: Predicting the consequences of global warming on Gentiana lutea germination at the edge of its distributional and ecological range
Source: PeerJ. 2020 May 6;8:e8894. doi: 10.7717/peerj.8894 (PMC7210811; doi:10.7717/peerj.8894)
Supplement: Supplemental Information 3 [file peerj-08-8894-s003.xlsx]

## Sheet: 122-16 Cleanin & Conservati
CLEANING FORM & GERMPLASM CONSERVATION			Progessive ID:		Initial date: 08/08/2016
N.122/16	Gentiana lutea subsp. lutea				Worker: BG-SAR
Precautions to be taken when handling the material:						Cut test: % positive:
Type of seed (dehydration tolerance)			!X ! Orthodox !__! Intermediate !__! Recalcitrant		References:
Initial test:	Fruit weight Weight: ______g N ° fruits/Kg: ________		N° seeds/fruit: ______ Nº counted fruits___________		Average fresh seed weight: ___ g Fresh total weight: ____ g
First clean (Pulpy fruits): !__! Manual !__! Mechanical !__! Chemical Date: ___/___/_______						Quarantine:	Initial date: ___/___/______
Treatment: ____________________________________________________________________________________________________________________________________________________________________________________________________________________________________________________________________________________________________________________________________________________________________________________________________…						Temperature (15-20°C) _______ °C Relative humidity: £60% _______ % Notes:______________________________________________________________________________________________________________________________________________________________
Post-Maturation:		Initial germination test:
Initial date 08/08/2016 Final date 21/10/2016 Duration____ (days)		!__! YES Initial date ___/___/______ Final date ___/___/______ % of germination: ______ % !__! NO Reasons: ____________________________________________________________________________________________________________________________________________________________________________________________________________________________________________________________________________________________________…
Temperature (15-20°C) _______ °C Relative humidity £40% _______ %
Clean: !X! Manual !X! Mechanical !__! Chemical Date 21/10/2016					Oil content: _________ % References: ____________________________________________________	Contenuto in proteine: _____________ % References: ___________________________________________________________	Initial Moisture Content: ____________ % Method:_________________________________________________________________________________________________________________________________________________________________________________________________________________________________________________________________________________________________________________
Treatment: ____________________________________________________________________________________________________________________________________________________________________________________________________________________________________________________________________________________________________________________________________________________________________________________________________…
Average seed weight (mg) 0.00103		Dehydration Initial date 11//10/2016 Final date 13/06/2017 Duration____ gg			Security test of containers and seals: Initial date 28/07/2017 Type of container: Bormioli Final date 31/07/2017 Type of seal: Rubber Conditions: Temperature: 20 °C Humidity: 40 % Results: Non-color change of indicators___________________________
Total accession weight (g) 34.21
N° of clean seeds 33.165		Temperature: (15-20°C) _____°C MC% final: (3,5-6.5 %) _____ % Method: _________________________________________________________________________________________________________________________________________________________________________________________________________________________________
Seed diameter (mm):
Seed lots:						Quality test:
Code	Closing date	Security test	Storage date	Location:		Vitality:
122/16A	2017-06-16	2017-06-16	2017-06-19	2016/13 15,100		!X! Germination test (GT)
122/16B	2017-06-16	2017-06-16	2017-06-19	2016/13 200		!__! Tetrazolium test (TTC)
122/16C	2017-06-16	2017-06-16	2017-06-19	2016/13 200		!__! X-rays (XR)
122/16D	2017-06-16	2017-06-16	2017-06-19	2016/13 200		!__! Others (OT):
122/16E	2017-06-16	2017-06-16	2017-06-19	2016/13 200
122/16F	2017-06-16	2017-06-16	2017-06-19	Cass. 61_ 15,100
						!__! Vigor or Performance (VP):
Notes:
Worker:

## Sheet: 118-16 Cleanin & Conservation
CLEANING FORM & GERMPLASM CONSERVATION			Progessive ID:		Initial date: 08/08/2016
N.118/16	Gentiana lutea subsp. lutea				Worker: BG-SAR
Precautions to be taken when handling the material:						Cut test: % positive:
Type of seed (dehydration tolerance)			! X ! Orthodox !__! Intermediate !__! Recalcitrant		References:
Initial test:	Fruit weight Weight: ______g N ° fruits/Kg: ________		N° seeds/fruit: ______ Nº counted fruits___________		Average fresh seed weight: ___ g Fresh total weight: ____ g
First clean (Pulpy fruits): !__! Manual !__! Mechanical !__! Chemical Date: ___/___/_______						Quarantine:	Initial date: ___/___/______
Treatment: ____________________________________________________________________________________________________________________________________________________________________________________________________________________________________________________________________________________________________________________________________________________________________________________________________…						Temperature (15-20°C) _______ °C Relative humidity: £60% _______ % Notes:______________________________________________________________________________________________________________________________________________________________
Post-Maturation:		Initial germination test:
Initial date _08/08/2016 Final date 21/10/2016 Duration____ (days)		!__! YES Initial date ___/___/______ Final date ___/___/______ % of germination: ______ % !__! NO Reasons: ____________________________________________________________________________________________________________________________________________________________________________________________________________________________________________________________________________________________________…
Temperature (15-20°C) _______ °C Relative humidity £40% _______ %
Clean: !X! Manual !X! Mechanical !__! Chemical Date 21/10/2016					Oil content: _________ % References: ____________________________________________________	Contenuto in proteine: _____________ % References: ___________________________________________________________	Initial Moisture Content: ____________ % Method:_________________________________________________________________________________________________________________________________________________________________________________________________________________________________________________________________________________________________________________
Treatment: ____________________________________________________________________________________________________________________________________________________________________________________________________________________________________________________________________________________________________________________________________________________________________________________________________…
Average seed weight (mg) 0.00131		Dehydration Initial date 10/11/2016 Final date 10/07/2017 Duration____ gg			Security test of containers and seals: Initial date 28/07/2017 Type of container: Bormioli Final date 31/07/2017 Type of seal: Rubber Conditions: Temperature: 20 °C Humidity: 40 % Results: Non-color change of indicators___________________________
Total accession weight (g) 48.24
N° of clean seeds 36.923		Temperature: (15-20°C) _____°C MC% final: (3,5-6.5 %) _____ % Method: _________________________________________________________________________________________________________________________________________________________________________________________________________________________________
Seed diameter (mm):
Seed lots:						Quality test:
Code	Closing date	Security test	Storage date	Location:		Vitality:
118/16A	2017-07-28	2017-07-28	2017-07-31	2016/21 16,000		!X! Germination test (GT)
118/16A	2017-07-28	2017-07-28	2017-07-31	2016/21 1,000		!__! Tetrazolium test (TTC)
118/16A	2017-07-28	2017-07-28	2017-07-31	2016/21 1,000		!__! X-rays (XR)
118/16A	2017-07-28	2017-07-28	2017-07-31	2016/21 1,000		!__! Others (OT):
118/16A	2017-07-28	2017-07-28	2017-07-31	2016/21 1,000
118/16F	2017-06-16	2017-06-16	2017-06-19	Cass. 61_ 16,000
						!__! Vigor or Performance (VP):
Notes:
Worker:
