# Supplementary material for: Predicting the consequences of global warming on Gentiana lutea germination at the edge of its distributional and ecological range
Source: PeerJ. 2020 May 6;8:e8894. doi: 10.7717/peerj.8894 (PMC7210811; doi:10.7717/peerj.8894)
Supplement: Supplemental Information 6 [file peerj-08-8894-s006.xlsx]

## Sheet: Foglio1
Date	Mean daily soil temperature (°C) IS	Mean daily soil temperature (°C) TM	Mean daily soil temperature of localities
2013-08-01	18.799	18.799	18.799
2013-08-02	18.313	18.313	18.313
2013-08-03	19.072	19.072	19.072
2013-08-04	18.685	18.685	18.685
2013-08-05	18.767	18.767	18.767
2013-08-06	19.041	19.041	19.041
2013-08-07	19.529	19.529	19.529
2013-08-08	19.029	19.029	19.029
2013-08-09	18.489	18.489	18.489
2013-08-10	19.123	19.123	19.123
2013-08-11	18.921	18.921	18.921
2013-08-12	18.555	18.555	18.555
2013-08-13	18.655	18.655	18.655
2013-08-14	18.172	18.172	18.172
2013-08-15	16.707	16.707	16.707
2013-08-16	16.776	16.776	16.776
2013-08-17	16.534	16.534	16.534
2013-08-18	16.835	16.835	16.835
2013-08-19	17.353	17.353	17.353
2013-08-20	16.813	16.813	16.813
2013-08-21	15.587	15.587	15.587
2013-08-22	15.879	15.879	15.879
2013-08-23	16.547	16.547	16.547
2013-08-24	16.467	16.467	16.467
2013-08-25	15.503	15.503	15.503
2013-08-26	17.226	17.226	17.226
2013-08-27	15.553	15.553	15.553
2013-08-28	14.321	14.321	14.321
2013-08-29	15.614	15.614	15.614
2013-08-30	13.797	13.797	13.797
2013-08-31	13.227	13.227	13.227
2013-09-01	13.556	13.556	13.556
2013-09-02	13.549	13.549	13.549
2013-09-03	13.91	13.91	13.91
2013-09-04	13.817	13.817	13.817
2013-09-05	13.806	13.806	13.806
2013-09-06	14.661	14.661	14.661
2013-09-07	14.846	14.846	14.846
2013-09-08	15.424	15.424	15.424
2013-09-09	15.154	15.154	15.154
2013-09-10	12.504	12.504	12.504
2013-09-11	13.306	13.306	13.306
2013-09-12	11.414	11.414	11.414
2013-09-13	10.98	10.98	10.98
2013-09-14	11.059	11.059	11.059
2013-09-15	12.715	12.715	12.715
2013-09-16	12.148	12.148	12.148
2013-09-17	11.317	11.317	11.317
2013-09-18	11.022	11.022	11.022
2013-09-19	11.754	11.754	11.754
2013-09-20	11.281	11.281	11.281
2013-09-21	12.575	12.575	12.575
2013-09-22	12.923	12.923	12.923
2013-09-23	11.541	11.541	11.541
2013-09-24	11.172	11.172	11.172
2013-09-25	11.349	11.349	11.349
2013-09-26	12.061	12.061	12.061
2013-09-27	12.603	12.603	12.603
2013-09-28	12.944	12.944	12.944
2013-09-29	13.436	13.436	13.436
2013-09-30	12.23	12.23	12.23
2013-10-01	12.364	12.364	12.364
2013-10-02	13.86	13.86	13.86
2013-10-03	14.099	14.099	14.099
2013-10-04	15.364	15.364	15.364
2013-10-05	14.657	14.657	14.657
2013-10-06	10.976	10.976	10.976
2013-10-07	10.226	10.226	10.226
2013-10-08	10.342	10.342	10.342
2013-10-09	9.969	9.969	9.969
2013-10-10	9.387	9.387	9.387
2013-10-11	10.138	10.138	10.138
2013-10-12	9.926	9.926	9.926
2013-10-13	10.707	10.707	10.707
2013-10-14	10.991	10.991	10.991
2013-10-15	10.896	10.896	10.896
2013-10-16	11.014	11.014	11.014
2013-10-17	9.806	9.806	9.806
2013-10-18	8.837	8.837	8.837
2013-10-19	11.058	11.058	11.058
2013-10-20	11.647	11.647	11.647
2013-10-21	11.55	11.55	11.55
2013-10-22	10.831	10.831	10.831
2013-10-23	10.61	10.61	10.61
2013-10-24	11.478	11.478	11.478
2013-10-25	10.208	10.208	10.208
2013-10-26	9.807	9.807	9.807
2013-10-27	8.961	8.961	8.961
2013-10-28	9.26	9.26	9.26
2013-10-29	8.997	8.997	8.997
2013-10-30	9.299	9.299	9.299
2013-10-31	8.66	8.66	8.66
2013-11-01	8.889	8.889	8.889
2013-11-02	8.933	8.933	8.933
2013-11-03	6.972	6.972	6.972
2013-11-04	8.695	8.695	8.695
2013-11-05	7.494	7.494	7.494
2013-11-06	8.573	8.573	8.573
2013-11-07	7.724	7.724	7.724
2013-11-08	6.97	6.97	6.97
2013-11-09	8.529	8.529	8.529
2013-11-10	6.749	6.749	6.749
2013-11-11	3.294	3.294	3.294
2013-11-12	4.358	4.358	4.358
2013-11-13	6.112	6.112	6.112
2013-11-14	6.915	6.915	6.915
2013-11-15	4.32	4.32	4.32
2013-11-16	5.305	5.305	5.305
2013-11-17	5.046	5.046	5.046
2013-11-18	6.035	6.035	6.035
2013-11-19	5.587	5.587	5.587
2013-11-20	5.035	5.035	5.035
2013-11-21	2.895	2.895	2.895
2013-11-22	3.413	3.413	3.413
2013-11-23	3.301	3.301	3.301
2013-11-24	3.071	3.071	3.071
2013-11-25	2.971	2.971	2.971
2013-11-26	2.887	2.887	2.887
2013-11-27	3.12	3.12	3.12
2013-11-28	3.238	3.238	3.238
2013-11-29	3.187	3.187	3.187
2013-11-30	3.16	3.16	3.16
2013-12-01	3.033	3.033	3.033
2013-12-02	3.224	3.224	3.224
2013-12-03	3.343	3.343	3.343
2013-12-04	3.215	3.215	3.215
2013-12-05	2.86	2.86	2.86
2013-12-06	2.478	2.478	2.478
2013-12-07	2.891	2.891	2.891
2013-12-08	2.511	2.511	2.511
2013-12-09	2.856	2.856	2.856
2013-12-10	2.359	2.359	2.359
2013-12-11	2.452	2.452	2.452
2013-12-12	2.333	2.333	2.333
2013-12-13	2.071	2.071	2.071
2013-12-14	1.935	1.935	1.935
2013-12-15	2.147	0.072	1.1095
2013-12-16	0.816	0.082	0.449
2013-12-17	0.169	0.103	0.136
2013-12-18	-0.093	0.086	-0.0035
2013-12-19	-0.208	0.053	-0.0775
2013-12-20	0.56	0.063	0.3115
2013-12-21	3.5	0.105	1.8025
2013-12-22	4.685	0.176	2.4305
2013-12-23	3.747	0.277	2.012
2013-12-24	3.8	1.032	2.416
2013-12-25	3.575	2.046	2.8105
2013-12-26	2.156	2.155	2.1555
2013-12-27	1.768	1.414	1.591
2013-12-28	1.77	1.095	1.4325
2013-12-29	1.592	2.213	1.9025
2013-12-30	1.464	1.408	1.436
2013-12-31	0.545	0.83	0.6875
2014-01-01	0.455	0.579	0.517
2014-01-02	2.52	1.193	1.8565
2014-01-03	4.399	3.349	3.874
2014-01-04	4.225	3.904	4.0645
2014-01-05	2.481	2.961	2.721
2014-01-06	1.771	1.812	1.7915
2014-01-07	2.116	1.388	1.752
2014-01-08	2.16	1.202	1.681
2014-01-09	2.073	1.513	1.793
2014-01-10	2.259	1.588	1.9235
2014-01-11	2.299	2.387	2.343
2014-01-12	1.668	2.906	2.287
2014-01-13	1.84	2.285	2.0625
2014-01-14	1.631	2.722	2.1765
2014-01-15	2.049	2.183	2.116
2014-01-16	1.392	1.183	1.2875
2014-01-17	2.248	1.346	1.797
2014-01-18	2.604	2.129	2.3665
2014-01-19	2.506	2.287	2.3965
2014-01-20	1.994	1.978	1.986
2014-01-21	1.68	1.286	1.483
2014-01-22	1.827	1.076	1.4515
2014-01-23	1.812	1.593	1.7025
2014-01-24	1.447	1.368	1.4075
2014-01-25	1.793	0.929	1.361
2014-01-26	1.614	0.529	1.0715
2014-01-27	1.802	0.675	1.2385
2014-01-28	1.61	0.498	1.054
2014-01-29	1.719	0.42	1.0695
2014-01-30	2.084	0.873	1.4785
2014-01-31	2.037	1.216	1.6265
2014-02-01	1.58	0.821	1.2005
2014-02-02	1.077	0.484	0.7805
2014-02-03	1.741	0.439	1.09
2014-02-04	1.864	0.37	1.117
2014-02-05	1.864	0.317	1.0905
2014-02-06	1.81	0.31	1.06
2014-02-07	2.279	0.775	1.527
2014-02-08	2.3	1.367	1.8335
2014-02-09	2.186	1.858	2.022
2014-02-10	3.501	2.592	3.0465
2014-02-11	1.454	1.768	1.611
2014-02-12	1.104	0.977	1.0405
2014-02-13	1.478	1.172	1.325
2014-02-14	3.306	2.723	3.0145
2014-02-15	4.686	3.876	4.281
2014-02-16	4.603	3.901	4.252
2014-02-17	4.327	4.064	4.1955
2014-02-18	4.268	4.152	4.21
2014-02-19	4.689	4.399	4.544
2014-02-20	3.709	3.376	3.5425
2014-02-21	3.134	2.835	2.9845
2014-02-22	2.329	2.374	2.3515
2014-02-23	2.413	1.842	2.1275
2014-02-24	1.846	1.304	1.575
2014-02-25	2.249	1.225	1.737
2014-02-26	2.851	1.772	2.3115
2014-02-27	1.465	1.521	1.493
2014-02-28	2.037	1.56	1.7985
2014-03-01	1.519	1.276	1.3975
2014-03-02	1.427	0.938	1.1825
2014-03-03	1.318	1.255	1.2865
2014-03-04	1.183	0.996	1.0895
2014-03-05	1.232	1.006	1.119
2014-03-06	1.293	1.555	1.424
2014-03-07	1.315	2.131	1.723
2014-03-08	1.308	2.062	1.685
2014-03-09	1.24	2.832	2.036
2014-03-10	1.046	2.07	1.558
2014-03-11	1.208	1.975	1.5915
2014-03-12	1.076	2.236	1.656
2014-03-13	1.248	2.118	1.683
2014-03-14	1.383	2.363	1.873
2014-03-15	1.425	3.743	2.584
2014-03-16	1.799	3.78	2.7895
2014-03-17	3.575	4.571	4.073
2014-03-18	4.773	5.044	4.9085
2014-03-19	5.155	5.034	5.0945
2014-03-20	5.828	5.267	5.5475
2014-03-21	5.532	5.56	5.546
2014-03-22	4.811	4.498	4.6545
2014-03-23	4.364	4.636	4.5
2014-03-24	1.861	2.111	1.986
2014-03-25	1.825	1.558	1.6915
2014-03-26	1.697	1.601	1.649
2014-03-27	1.624	1.669	1.6465
2014-03-28	1.408	3.356	2.382
2014-03-29	1.691	3.69	2.6905
2014-03-30	2.124	4.367	3.2455
2014-03-31	4.507	4.723	4.615
2014-04-01	5.858	5.407	5.6325
2014-04-02	6.764	6.235	6.4995
2014-04-03	6.799	6.751	6.775
2014-04-04	5.751	6.162	5.9565
2014-04-05	4.987	5.259	5.123
2014-04-06	6.347	5.93	6.1385
2014-04-07	7.515	6.755	7.135
2014-04-08	7.765	7.374	7.5695
2014-04-09	6.623	7.227	6.925
2014-04-10	7.225	7.593	7.409
2014-04-11	7.869	7.896	7.8825
2014-04-12	7.808	8.132	7.97
2014-04-13	8.636	7.972	8.304
2014-04-14	9.276	8.581	8.9285
2014-04-15	7.111	7.363	7.237
2014-04-16	5.429	6.154	5.7915
2014-04-17	4.025	4.926	4.4755
2014-04-18	6.013	5.328	5.6705
2014-04-19	9.931	10.022	9.9765
2014-04-20	8.841	7.581	8.211
2014-04-21	9.687	8.542	9.1145
2014-04-22	8.482	8.232	8.357
2014-04-23	9.249	8.244	8.7465
2014-04-24	9.432	8.45	8.941
2014-04-25	7.771	7.434	7.6025
2014-04-26	7.328	7.159	7.2435
2014-04-27	5.736	5.963	5.8495
2014-04-28	5.508	5.06	5.284
2014-04-29	5.737	5.258	5.4975
2014-04-30	7.411	6.439	6.925
2014-05-01	7.917	7.087	7.502
2014-05-02	6.583	6.124	6.3535
2014-05-03	5.407	5.138	5.2725
2014-05-04	6.661	6.728	6.6945
2014-05-05	8.83	8.138	8.484
2014-05-06	9.811	8.81	9.3105
2014-05-07	11.343	10.467	10.905
2014-05-08	10.973	10.763	10.868
2014-05-09	10.904	10.628	10.766
2014-05-10	11.627	11.117	11.372
2014-05-11	13.079	12.285	12.682
2014-05-12	11.399	11.647	11.523
2014-05-13	11.294	11.076	11.185
2014-05-14	9.367	8.769	9.068
2014-05-15	9.208	8.539	8.8735
2014-05-16	9.206	8.351	8.7785
2014-05-17	10.471	9.762	10.1165
2014-05-18	10.142	9.514	9.828
2014-05-19	9.901	10.111	10.006
2014-05-20	12.897	11.281	12.089
2014-05-21	13.163	12.39	12.7765
2014-05-22	14.315	14.55	14.4325
2014-05-23	13.642	13.859	13.7505
2014-05-24	13.087	12.093	12.59
2014-05-25	12.107	11.53	11.8185
2014-05-26	13.716	11.641	12.6785
2014-05-27	11.231	10.69	10.9605
2014-05-28	10.529	9.796	10.1625
2014-05-29	11.983	9.901	10.942
2014-05-30	11.302	10.622	10.962
2014-05-31	11.013	10.61	10.8115
2014-06-01	11.214	10.728	10.971
2014-06-02	10.93	11.265	11.0975
2014-06-03	11.999	11.237	11.618
2014-06-04	12.658	11.496	12.077
2014-06-05	14.626	13.129	13.8775
2014-06-06	14.61	14.468	14.539
2014-06-07	16.059	14.807	15.433
2014-06-08	15.894	15.2	15.547
2014-06-09	15.977	15.031	15.504
2014-06-10	15.899	15.225	15.562
2014-06-11	15.906	15.622	15.764
2014-06-12	15.337	15.936	15.6365
2014-06-13	15.838	15.572	15.705
2014-06-14	16.705	15.648	16.1765
2014-06-15	15.841	15.188	15.5145
2014-06-16	14.866	14.082	14.474
2014-06-17	14.165	13.912	14.0385
2014-06-18	14.282	12.671	13.4765
2014-06-19	13.119	12.524	12.8215
2014-06-20	14.138	12.943	13.5405
2014-06-21	15.132	14.114	14.623
2014-06-22	16.967	16.495	16.731
2014-06-23	16.386	17.332	16.859
2014-06-24	17.776	17.512	17.644
2014-06-25	16.771	17.19	16.9805
2014-06-26	13.58	14.501	14.0405
2014-06-27	15.77	14.547	15.1585
2014-06-28	16.895	14.301	15.598
2014-06-29	17.968	15.5874	16.7777
2014-06-30	14.646	16.09	15.368
2014-07-01	15.273	16.382	15.8275
2014-07-02	17.256	17.256	17.256
2014-07-03	17.997	17.997	17.997
2014-07-04	18.289	18.289	18.289
2014-07-05	17.429	17.429	17.429
2014-07-06	17.769	17.769	17.769
2014-07-07	16.626	16.626	16.626
2014-07-08	16.633	16.633	16.633
2014-07-09	13.684	13.684	13.684
2014-07-10	10.921	10.921	10.921
2014-07-11	12.731	12.731	12.731
2014-07-12	14.092	14.092	14.092
2014-07-13	13.412	13.412	13.412
2014-07-14	12.697	12.697	12.697
2014-07-15	15.602	15.602	15.602
2014-07-16	17.355	17.355	17.355
2014-07-17	16.889	16.889	16.889
2014-07-18	18.636	18.636	18.636
2014-07-19	19.153	19.153	19.153
2014-07-20	18.532	18.532	18.532
2014-07-21	17.339	17.339	17.339
2014-07-22	16.027	16.027	16.027
2014-07-23	18.309	18.309	18.309
2014-07-24	18.425	18.425	18.425
2014-07-25	18.913	18.913	18.913
2014-07-26	19.865	19.865	19.865
2014-07-27	17.041	17.041	17.041
2014-07-28	18.23	18.23	18.23
2014-07-29	19.107	18.607	18.857
2014-07-30	13.08	12.58	12.83
2014-07-31	16.822	16.322	16.572
2014-08-01	17.297	16.797	17.047
2014-08-02	17.094	16.594	16.844
2014-08-03	17.811	17.311	17.561
2014-08-04	17.605	17.105	17.355
2014-08-05	17.881	17.381	17.631
2014-08-06	18.13	17.63	17.88
2014-08-07	18.188	17.688	17.938
2014-08-08	19.696	19.196	19.446
2014-08-09	19.586	19.086	19.336
2014-08-10	19.441	18.941	19.191
2014-08-11	20.479	19.979	20.229
2014-08-12	20.575	20.075	20.325
2014-08-13	20.473	19.973	20.223
2014-08-14	18.472	17.972	18.222
2014-08-15	16.685	16.185	16.435
2014-08-16	17.095	16.595	16.845
2014-08-17	17.469	16.969	17.219
2014-08-18	17.381	16.881	17.131
2014-08-19	19.51	19.01	19.26
2014-08-20	19.727	19.227	19.477
2014-08-21	19.72	19.22	19.47
2014-08-22	19.681	19.181	19.431
2014-08-23	18.776	18.276	18.526
2014-08-24	17.141	16.641	16.891
2014-08-25	17.571	17.071	17.321
2014-08-26	18.878	18.378	18.628
2014-08-27	19.611	19.111	19.361
2014-08-28	19.334	18.834	19.084
2014-08-29	19.398	18.898	19.148
2014-08-30	19.611	19.111	19.361
2014-08-31	19.504	19.004	19.254
2014-09-01	15.853	15.353	15.603
2014-09-02	15.438	14.938	15.188
2014-09-03	16.136	15.636	15.886
2014-09-04	16.147	15.647	15.897
2014-09-05	17.251	16.751	17.001
2014-09-06	17.299	16.799	17.049
2014-09-07	18.434	17.934	18.184
2014-09-08	18.109	17.609	17.859
2014-09-09	17.631	17.131	17.381
2014-09-10	16.6	16.1	16.35
2014-09-11	16.843	16.343	16.593
2014-09-12	16.224	15.724	15.974
2014-09-13	14.996	14.496	14.746
2014-09-14	15.715	15.215	15.465
2014-09-15	16.373	15.873	16.123
2014-09-16	16.316	15.816	16.066
2014-09-17	16.325	15.825	16.075
2014-09-18	17.081	16.581	16.831
2014-09-19	17.188	16.688	16.938
2014-09-20	17.911	17.411	17.661
2014-09-21	16.806	16.306	16.556
2014-09-22	16.081	15.581	15.831
2014-09-23	15.655	15.155	15.405
2014-09-24	13.477	12.977	13.227
2014-09-25	13.708	13.208	13.458
2014-09-26	12.283	11.783	12.033
2014-09-27	12.166	11.666	11.916
2014-09-28	12.485	11.985	12.235
2014-09-29	12.544	12.044	12.294
2014-09-30	13.3	12.8	13.05
2014-10-01	14.674	14.174	14.424
2014-10-02	14.01	13.51	13.76
2014-10-03	12.941	12.441	12.691
2014-10-04	12.942	12.442	12.692
2014-10-05	10.962	10.462	10.712
2014-10-06	11.601	11.101	11.351
2014-10-07	11.895	11.395	11.645
2014-10-08	13.027	12.527	12.777
2014-10-09	13.903	13.403	13.653
2014-10-10	13.637	13.137	13.387
2014-10-11	13.396	12.896	13.146
2014-10-12	14.662	14.162	14.412
2014-10-13	14.33	13.83	14.08
2014-10-14	13.682	13.182	13.432
2014-10-15	13.8	13.3	13.55
2014-10-16	12.972	12.472	12.722
2014-10-17	11.858	11.358	11.608
2014-10-18	11.093	10.593	10.843
2014-10-19	10.745	10.245	10.495
2014-10-20	10.235	9.735	9.985
2014-10-21	10.994	10.494	10.744
2014-10-22	9.704	9.204	9.454
2014-10-23	5.698	5.198	5.448
2014-10-24	5.857	5.357	5.607
2014-10-25	5.816	5.316	5.566
2014-10-26	7.101	6.601	6.851
2014-10-27	7.528	7.028	7.278
2014-10-28	7.145	6.645	6.895
2014-10-29	7.108	6.608	6.858
2014-10-30	6.192	5.692	5.942
2014-10-31	9.949	9.449	9.699
2014-11-01	9.944	9.444	9.694
2014-11-02	3.203	2.703	2.953
2014-11-03	3.829	3.329	3.579
2014-11-04	3.392	2.892	3.142
2014-11-05	7.375	6.875	7.125
2014-11-06	8.175	7.675	7.925
2014-11-07	6.562	6.062	6.312
2014-11-08	6.005	5.505	5.755
2014-11-09	5.662	5.162	5.412
2014-11-10	6.861	6.361	6.611
2014-11-11	9.183	8.683	8.933
2014-11-12	7.361	6.861	7.111
2014-11-13	6.389	5.889	6.139
2014-11-14	6.367	5.867	6.117
2014-11-15	6.648	6.148	6.398
2014-11-16	8.16	7.66	7.91
2014-11-17	5.744	5.244	5.494
2014-11-18	6.332	5.832	6.082
2014-11-19	4.748	4.248	4.498
2014-11-20	5.184	4.684	4.934
2014-11-21	3.249	2.749	2.999
2014-11-22	4.312	3.812	4.062
2014-11-23	7.845	7.345	7.595
2014-11-24	9.381	8.881	9.131
2014-11-25	9.713	9.213	9.463
2014-11-26	9.446	8.946	9.196
2014-11-27	8.056	7.556	7.806
2014-11-28	6.717	6.217	6.467
2014-11-29	8.053	7.553	7.803
2014-11-30	7.689	7.189	7.439
2014-12-01	7.877	7.377	7.627
2014-12-02	6.17	5.67	5.92
2014-12-03	6.45	5.95	6.2
2014-12-04	6.241	5.741	5.991
2014-12-05	5.071	4.571	4.821
2014-12-06	4.825	4.325	4.575
2014-12-07	3.067	2.567	2.817
2014-12-08	1.542	1.042	1.292
2014-12-09	3.59	3.09	3.34
2014-12-10	3.201	2.701	2.951
2014-12-11	1.679	1.179	1.429
2014-12-12	2.259	1.759	2.009
2014-12-13	0.774	0.274	0.524
2014-12-14	-0.063	-0.563	-0.313
2014-12-15	0.868	0.368	0.618
2014-12-16	2.345	1.845	2.095
2014-12-17	1.57	1.07	1.32
2014-12-18	3.38	2.88	3.13
2014-12-19	4.113	3.613	3.863
2014-12-20	1.654	1.154	1.404
2014-12-21	3.554	3.054	3.304
2014-12-22	1.81	1.31	1.56
2014-12-23	0.182	-0.318	-0.068
2014-12-24	-0.71	-1.21	-0.96
2014-12-25	-1.314	-1.814	-1.564
2014-12-26	0.369	-0.131	0.119
2014-12-27	1.961	1.461	1.711
2014-12-28	1.044	0.544	0.794
2014-12-29	1.323	0.823	1.073
2014-12-30	1.651	1.151	1.401
2014-12-31	1.441	0.941	1.191
2015-01-01	1.352	0.852	1.102
2015-01-02	1.277	0.777	1.027
2015-01-03	1.535	1.035	1.285
2015-01-04	1.663	1.163	1.413
2015-01-05	3.415	2.915	3.165
2015-01-06	-0.125	-0.625	-0.375
2015-01-07	0.247	-0.253	-0.003
2015-01-08	0.804	0.304	0.554
2015-01-09	0.323	-0.177	0.073
2015-01-10	1.69	1.19	1.44
2015-01-11	5.456	4.956	5.206
2015-01-12	3.726	3.226	3.476
2015-01-13	-0.02	-0.52	-0.27
2015-01-14	0.377	-0.123	0.127
2015-01-15	1.08	0.58	0.83
2015-01-16	0.899	0.399	0.649
2015-01-17	3.639	3.139	3.389
2015-01-18	2.784	2.284	2.534
2015-01-19	0.273	-0.227	0.023
2015-01-20	-0.115	-0.615	-0.365
2015-01-21	0.583	0.083	0.333
2015-01-22	1.02	0.52	0.77
2015-01-23	1.325	0.825	1.075
2015-01-24	1.356	0.856	1.106
2015-01-25	1.434	0.934	1.184
2015-01-26	1.044	0.544	0.794
2015-01-27	0.874	0.374	0.624
2015-01-28	0.728	0.228	0.478
2015-01-29	0.782	0.282	0.532
2015-01-30	0.553	0.053	0.303
2015-01-31	0.754	0.254	0.504
2015-02-01	1.05	0.55	0.8
2015-02-02	1.18	0.68	0.93
2015-02-03	1.277	0.777	1.027
2015-02-04	1.308	0.808	1.058
2015-02-05	1.184	0.684	0.934
2015-02-06	1.11	0.61	0.86
2015-02-07	1.081	0.581	0.831
2015-02-08	1.088	0.588	0.838
2015-02-09	1.129	0.629	0.879
2015-02-10	1.168	0.668	0.918
2015-02-11	1.163	0.663	0.913
2015-02-12	1.132	0.632	0.882
2015-02-13	1.151	0.651	0.901
2015-02-14	1.16	0.66	0.91
2015-02-15	1.179	0.679	0.929
2015-02-16	1.196	0.696	0.946
2015-02-17	1.223	0.723	0.973
2015-02-18	1.175	0.675	0.925
2015-02-19	1.588	1.088	1.338
2015-02-20	2.492	1.992	2.242
2015-02-21	1.869	1.369	1.619
2015-02-22	1.624	1.124	1.374
2015-02-23	1.544	1.044	1.294
2015-02-24	1.828	1.328	1.578
2015-02-25	2.641	2.141	2.391
2015-02-26	2.019	1.519	1.769
2015-02-27	1.844	1.344	1.594
2015-02-28	1.794	1.294	1.544
2015-03-01	1.777	1.277	1.527
2015-03-02	1.754	1.254	1.504
2015-03-03	2.233	1.733	1.983
2015-03-04	2.694	2.194	2.444
2015-03-05	2.93	2.43	2.68
2015-03-06	1.806	1.306	1.556
2015-03-07	1.146	0.646	0.896
2015-03-08	0.636	0.136	0.386
2015-03-09	1.534	1.034	1.284
2015-03-10	1.917	1.417	1.667
2015-03-11	2.539	2.039	2.289
2015-03-12	2.592	2.092	2.342
2015-03-13	2.965	2.465	2.715
2015-03-14	1.313	0.813	1.063
2015-03-15	4.577	4.077	4.327
2015-03-16	4.304	3.804	4.054
2015-03-17	3.381	2.881	3.131
2015-03-18	5.101	4.601	4.851
2015-03-19	5.773	5.273	5.523
2015-03-20	5.114	4.614	4.864
2015-03-21	5.187	4.687	4.937
2015-03-22	4.707	4.207	4.457
2015-03-23	6.063	5.563	5.813
2015-03-24	6.455	5.955	6.205
2015-03-25	4.743	4.243	4.493
2015-03-26	6.417	5.917	6.167
2015-03-27	6.161	5.661	5.911
2015-03-28	4.615	4.115	4.365
2015-03-29	3.863	3.363	3.613
2015-03-30	6.851	6.351	6.601
2015-03-31	6.414	5.914	6.164
2015-04-01	7.642	7.142	7.392
2015-04-02	4.67	4.17	4.42
2015-04-03	6.648	6.148	6.398
2015-04-04	9.116	8.616	8.866
2015-04-05	5.809	5.309	5.559
2015-04-06	4.363	3.863	4.113
2015-04-07	3.339	2.839	3.089
2015-04-08	1.093	0.593	0.843
2015-04-09	3.089	2.589	2.839
2015-04-10	5.959	5.459	5.709
2015-04-11	7.893	7.393	7.643
2015-04-12	9.692	9.192	9.442
2015-04-13	8.613	8.113	8.363
2015-04-14	9.549	9.049	9.299
2015-04-15	10.825	10.325	10.575
2015-04-16	11.396	10.896	11.146
2015-04-17	12.186	11.686	11.936
2015-04-18	11.67	11.17	11.42
2015-04-19	11.956	11.456	11.706
2015-04-20	12.151	11.651	11.901
2015-04-21	10.637	10.137	10.387
2015-04-22	12.315	11.815	12.065
2015-04-23	12.902	12.402	12.652
2015-04-24	12.946	12.446	12.696
2015-04-25	12.134	11.634	11.884
2015-04-26	11.831	11.331	11.581
2015-04-27	8.638	8.138	8.388
2015-04-28	6.225	5.725	5.975
2015-04-29	7.317	6.817	7.067
2015-04-30	8.068	7.568	7.818
2015-05-01	9.601	9.101	9.351
2015-05-02	11.449	10.949	11.199
2015-05-03	13.892	13.392	13.642
2015-05-04	15.108	14.608	14.858
2015-05-05	17.204	16.704	16.954
2015-05-06	16.194	15.694	15.944
2015-05-07	15.438	14.938	15.188
2015-05-08	15.281	14.781	15.031
2015-05-09	14.719	14.219	14.469
2015-05-10	15.693	15.193	15.443
2015-05-11	16.822	16.322	16.572
2015-05-12	17.771	17.271	17.521
2015-05-13	17.158	16.658	16.908
2015-05-14	18.673	18.173	18.423
2015-05-15	16.711	16.211	16.461
2015-05-16	11.344	10.844	11.094
2015-05-17	11.839	11.339	11.589
2015-05-18	14.546	14.046	14.296
2015-05-19	15.186	14.686	14.936
2015-05-20	14.939	14.439	14.689
2015-05-21	11.472	10.972	11.222
2015-05-22	10.169	9.669	9.919
2015-05-23	9.513	9.013	9.263
2015-05-24	11.521	11.021	11.271
2015-05-25	12.196	11.696	11.946
2015-05-26	11.568	11.068	11.318
2015-05-27	11.928	11.428	11.678
2015-05-28	13.015	12.515	12.765
2015-05-29	13.784	13.284	13.534
2015-05-30	14.505	14.005	14.255
2015-05-31	14.687	14.187	14.437
2015-06-01	15.644	15.144	15.394
2015-06-02	15.362	14.862	15.112
2015-06-03	16.618	16.118	16.368
2015-06-04	16.554	16.054	16.304
2015-06-05	17.388	16.888	17.138
2015-06-06	19.071	18.571	18.821
2015-06-07	19.389	18.889	19.139
2015-06-08	14.866	14.366	14.616
2015-06-09	15.36	14.86	15.11
2015-06-10	16.742	16.242	16.492
2015-06-11	15.342	14.842	15.092
2015-06-12	16.618	16.118	16.368
2015-06-13	16.554	16.054	16.304
2015-06-14	17.388	16.888	17.138
2015-06-15	19.071	18.571	18.821
2015-06-16	19.389	18.889	19.139
2015-06-17	20.2217	19.7217	19.9717
2015-06-18	21.0276	20.5276	20.7776
2015-06-19	21.8335	21.3335	21.5835
2015-06-20	22.6394	22.1394	22.3894
2015-06-21	23.4453	22.9453	23.1953
2015-06-22	24.2512	23.7512	24.0012
2015-06-23	25.0571	24.5571	24.8071
2015-06-24	25.863	25.363	25.613
2015-06-25	26.6689	26.1689	26.4189
2015-06-26	27.4748	26.9748	27.2248
2015-06-27	28.2807	27.7807	28.0307
2015-06-28	26.829	26.329	26.579
2015-06-29	25.537	25.037	25.287
2015-06-30	23.101	22.601	22.851
2015-07-01	23.686	23.186	23.436
2015-07-02	27.576	27.076	27.326
2015-07-03	24.994	24.494	24.744
2015-07-04	26.574	26.074	26.324
2015-07-05	26.908	26.408	26.658
2015-07-06	26.851	26.351	26.601
2015-07-07	27.69	27.19	27.44
2015-07-08	27.026	26.526	26.776
2015-07-09	26.193	25.693	25.943
2015-07-10	28.41	27.91	28.16
2015-07-11	26.875	26.375	26.625
2015-07-12	26.289	25.789	26.039
2015-07-13	25.345	24.845	25.095
2015-07-14	27.387	26.887	27.137
2015-07-15	27.749	27.249	27.499
2015-07-16	27.736	27.236	27.486
2015-07-17	26.091	25.591	25.841
2015-07-18	25.418	24.918	25.168
2015-07-19	27.727	27.227	27.477
2015-07-20	27.42	26.92	27.17
2015-07-21	19.385	18.885	19.135
2015-07-22	18.518	18.018	18.268
2015-07-23	19.316	18.816	19.066
2015-07-24	17.898	17.398	17.648
2015-07-25	19.201	18.701	18.951
2015-07-26	19.121	18.621	18.871
2015-07-27	20.569	20.069	20.319
2015-07-28	21.109	20.609	20.859
2015-07-29	23.204	22.704	22.954
2015-07-30	24.183	23.683	23.933
2015-07-31	25.435	24.935	25.185
2015-08-01	23.391	22.891	23.141
2015-08-02	24.324	23.824	24.074
2015-08-03	23.813	23.313	23.563
2015-08-04	24.736	24.236	24.486
2015-08-05	26.283	25.783	26.033
2015-08-06	25.137	24.637	24.887
2015-08-07	23.345	22.845	23.095
2015-08-08	23.712	23.212	23.462
2015-08-09	24.803	24.303	24.553
2015-08-10	19.616	19.116	19.366
2015-08-11	16.821	16.321	16.571
2015-08-12	20.913	20.413	20.663
2015-08-13	22.204	21.704	21.954
2015-08-14	22.615	22.115	22.365
2015-08-15	17.893	17.393	17.643
2015-08-16	16.304	15.804	16.054
2015-08-17	15.787	15.287	15.537
2015-08-18	19.439	18.939	19.189
2015-08-19	18.34	17.84	18.09
2015-08-20	17.008	16.508	16.758
2015-08-21	17.844	17.344	17.594
2015-08-22	18.405	17.905	18.155
2015-08-23	22.077	21.577	21.827
2015-08-24	17.772	17.272	17.522
2015-08-25	18.567	18.067	18.317
2015-08-26	17.507	17.007	17.257
2015-08-27	16.785	16.285	16.535
2015-08-28	16.614	16.114	16.364
2015-08-29	17.153	16.653	16.903
2015-08-30	18.598	18.098	18.348
2015-08-31	17.848	17.348	17.598
2015-09-01	17.713	17.213	17.463
2015-09-02	17.841	17.341	17.591
2015-09-03	17.56	17.06	17.31
2015-09-04	14.965	14.465	14.715
2015-09-05	13.823	13.323	13.573
2015-09-06	11.685	11.185	11.435
2015-09-07	13.062	12.562	12.812
2015-09-08	12.745	12.245	12.495
2015-09-09	10.495	9.995	10.245
2015-09-10	10.41	9.91	10.16
2015-09-11	11.974	11.474	11.724
2015-09-12	12.334	11.834	12.084
2015-09-13	15.898	15.398	15.648
2015-09-14	15.133	14.633	14.883
2015-09-15	15.783	15.283	15.533
2015-09-16	17.732	17.232	17.482
2015-09-17	18.908	18.408	18.658
2015-09-18	17.81	17.31	17.56
2015-09-19	15.262	14.762	15.012
2015-09-20	10.25	9.75	10
2015-09-21	10.585	10.085	10.335
2015-09-22	10.387	9.887	10.137
2015-09-23	9.542	9.042	9.292
2015-09-24	8.568	8.068	8.318
2015-09-25	9.446	8.946	9.196
2015-09-26	10.136	9.636	9.886
2015-09-27	9.226	8.726	8.976
2015-09-28	8.571	8.071	8.321
2015-09-29	8.826	8.326	8.576
2015-09-30	9.195	8.695	8.945
2015-10-01	9.28	8.78	9.03
2015-10-02	8.575	8.075	8.325
2015-10-03	8.591	8.091	8.341
2015-10-04	10.396	9.896	10.146
2015-10-05	11.012	10.512	10.762
2015-10-06	11.754	11.254	11.504
2015-10-07	10.057	9.557	9.807
2015-10-08	9.155	8.655	8.905
2015-10-09	7.759	7.259	7.509
2015-10-10	8.025	7.525	7.775
2015-10-11	8.078	7.578	7.828
2015-10-12	7.993	7.493	7.743
2015-10-13	10.01	9.51	9.76
2015-10-14	9.057	8.557	8.807
2015-10-15	6.316	5.816	6.066
2015-10-16	6.177	5.677	5.927
2015-10-17	6.575	6.075	6.325
2015-10-18	8.568	8.068	8.318
2015-10-19	9.288	8.788	9.038
2015-10-20	9.245	8.745	8.995
2015-10-21	7.928	7.428	7.678
2015-10-22	5.498	4.998	5.248
2015-10-23	4.237	3.737	3.987
2015-10-24	4.087	3.587	3.837
2015-10-25	6.135	5.635	5.885
2015-10-26	6.811	6.311	6.561
2015-10-27	8.125	7.625	7.875
2015-10-28	7.6	7.1	7.35
2015-10-29	5.688	5.188	5.438
2015-10-30	5.772	5.272	5.522
2015-10-31	5.684	5.184	5.434
2015-11-01	5.535	5.035	5.285
2015-11-02	5.599	5.099	5.349
2015-11-03	7.386	6.886	7.136
2015-11-04	7.617	7.117	7.367
2015-11-05	6.393	5.893	6.143
2015-11-06	4.414	3.914	4.164
2015-11-07	3.717	3.217	3.467
2015-11-08	3.561	3.061	3.311
2015-11-09	3.513	3.013	3.263
2015-11-10	4.05	3.55	3.8
2015-11-11	3.923	3.423	3.673
2015-11-12	4.179	3.679	3.929
2015-11-13	4.961	4.461	4.711
2015-11-14	4.85	4.35	4.6
2015-11-15	3.732	3.232	3.482
2015-11-16	3.069	2.569	2.819
2015-11-17	2.37	1.87	2.12
2015-11-18	2.948	2.448	2.698
2015-11-19	3.115	2.615	2.865
2015-11-20	4.299	3.799	4.049
2015-11-21	3.422	2.922	3.172
2015-11-22	0.215	-0.285	-0.035
2015-11-23	-0.044	-0.544	-0.294
2015-11-24	-0.349	-0.849	-0.599
2015-11-25	-0.126	-0.626	-0.376
2015-11-26	-0.885	-1.385	-1.135
2015-11-27	-0.705	-1.205	-0.955
2015-11-28	-1.246	-1.746	-1.496
2015-11-29	-0.964	-1.464	-1.214
2015-11-30	-0.4	-0.9	-0.65
2015-12-01	-0.649	-1.149	-0.899
2015-12-02	-1.194	-1.694	-1.444
2015-12-03	-0.66	-1.16	-0.91
2015-12-04	0.345	-0.155	0.095
2015-12-05	0.738	0.238	0.488
2015-12-06	1.767	1.267	1.517
2015-12-07	2.654	2.154	2.404
2015-12-08	-0.147	-0.647	-0.397
2015-12-09	0.365	-0.135	0.115
2015-12-10	-0.96	-1.46	-1.21
2015-12-11	-2.541	-3.041	-2.791
2015-12-12	-2.63	-3.13	-2.88
2015-12-13	-2.111	-2.611	-2.361
2015-12-14	-2.391	-2.891	-2.641
2015-12-15	-2.534	-3.034	-2.784
2015-12-16	0.041	-0.459	-0.209
2015-12-17	-0.725	-1.225	-0.975
2015-12-18	-1.46	-1.96	-1.71
2015-12-19	-0.712	-1.212	-0.962
2015-12-20	0.181	-0.319	-0.069
2015-12-21	-0.132	-0.632	-0.382
2015-12-22	-1.143	-1.643	-1.393
2015-12-23	-1.296	-1.796	-1.546
2015-12-24	-1.057	-1.557	-1.307
2015-12-25	0.101	-0.399	-0.149
2015-12-26	0.393	-0.107	0.143
2015-12-27	-1.406	-1.906	-1.656
2015-12-28	-2.39	-2.89	-2.64
2015-12-29	-2.536	-3.036	-2.786
2015-12-30	-0.461	-0.961	-0.711
2015-12-31	0.106	-0.394	-0.144
2016-01-01	1.151	0.651	0.901
2016-01-02	2.074	1.574	1.824
2016-01-03	0.508	0.008	0.258
2016-01-04	2.207	1.707	1.957
2016-01-05	3.264	2.764	3.014
2016-01-06	-0.196	-0.696	-0.446
2016-01-07	-0.741	-1.241	-0.991
2016-01-08	3.302	2.802	3.052
2016-01-09	2.724	2.224	2.474
2016-01-10	2.749	2.249	2.499
2016-01-11	2.674	2.174	2.424
2016-01-12	0.593	0.093	0.343
2016-01-13	-1.247	-1.747	-1.497
2016-01-14	-1.569	-2.069	-1.819
2016-01-15	-1.177	-1.677	-1.427
2016-01-16	-2.498	-2.998	-2.748
2016-01-17	-1.971	-2.471	-2.221
2016-01-18	-1.785	-2.285	-2.035
2016-01-19	-1.742	-2.242	-1.992
2016-01-20	-1.667	-2.167	-1.917
2016-01-21	-1.639	-2.139	-1.889
2016-01-22	-1.601	-2.101	-1.851
2016-01-23	-1.533	-2.033	-1.783
2016-01-24	-1.574	-2.074	-1.824
2016-01-25	-1.62	-2.12	-1.87
2016-01-26	-1.718	-2.218	-1.968
2016-01-27	-1.612	-2.112	-1.862
2016-01-28	-1.54	-2.04	-1.79
2016-01-29	-1.501	-2.001	-1.751
2016-01-30	-1.429	-1.929	-1.679
2016-01-31	-1.004	-1.504	-1.254
2016-02-01	1.37	0.87	1.12
2016-02-02	0.247	-0.253	-0.003
2016-02-03	-0.226	-0.726	-0.476
2016-02-04	-2.108	-2.608	-2.358
2016-02-05	-2.544	-3.044	-2.794
2016-02-06	-1.737	-2.237	-1.987
2016-02-07	0.431	-0.069	0.181
2016-02-08	-0.252	-0.752	-0.502
2016-02-09	0.155	-0.345	-0.095
2016-02-10	0.252	-0.248	0.002
2016-02-11	1.001	0.501	0.751
2016-02-12	1.352	0.852	1.102
2016-02-13	3.161	2.661	2.911
2016-02-14	3.515	3.015	3.265
2016-02-15	1.27	0.77	1.02
2016-02-16	-0.085	-0.585	-0.335
2016-02-17	0.857	0.357	0.607
2016-02-18	-0.872	-1.372	-1.122
2016-02-19	-0.856	-1.356	-1.106
2016-02-20	-2.252	-2.752	-2.502
2016-02-21	0.855	0.355	0.605
2016-02-22	4.194	3.694	3.944
2016-02-23	2.781	2.281	2.531
2016-02-24	1.431	0.931	1.181
2016-02-25	0.022	-0.478	-0.228
2016-02-26	0.641	0.141	0.391
2016-02-27	0.319	-0.181	0.069
2016-02-28	-1.394	-1.894	-1.644
2016-02-29	-1.68	-2.18	-1.93
2016-03-01	-2.255	-2.755	-2.505
2016-03-02	-1.859	-2.359	-2.109
2016-03-03	-1.822	-2.322	-2.072
2016-03-04	-1.636	-2.136	-1.886
2016-03-05	-1.639	-2.139	-1.889
2016-03-06	-1.613	-2.113	-1.863
2016-03-07	-1.603	-2.103	-1.853
2016-03-08	-1.636	-2.136	-1.886
2016-03-09	-1.667	-2.167	-1.917
2016-03-10	-1.668	-2.168	-1.918
2016-03-11	-1.709	-2.209	-1.959
2016-03-12	-1.742	-2.242	-1.992
2016-03-13	-1.71	-2.21	-1.96
2016-03-14	-1.678	-2.178	-1.928
2016-03-15	-1.656	-2.156	-1.906
2016-03-16	-1.606	-2.106	-1.856
2016-03-17	-1.561	-2.061	-1.811
2016-03-18	-1.523	-2.023	-1.773
2016-03-19	-1.463	-1.963	-1.713
2016-03-20	-0.709	-1.209	-0.959
2016-03-21	4.826	4.326	4.576
2016-03-22	3.41	2.91	3.16
2016-03-23	0.443	-0.057	0.193
2016-03-24	0.113	-0.387	-0.137
2016-03-25	0.146	-0.354	-0.104
2016-03-26	2.664	2.164	2.414
2016-03-27	3.154	2.654	2.904
2016-03-28	3.798	3.298	3.548
2016-03-29	4.853	4.353	4.603
2016-03-30	5.672	5.172	5.422
2016-03-31	6.846	6.346	6.596
2016-04-01	6.91	6.41	6.66
2016-04-02	5.231	4.731	4.981
2016-04-03	6.553	6.053	6.303
2016-04-04	7.453	6.953	7.203
2016-04-05	7.165	6.665	6.915
2016-04-06	6.158	5.658	5.908
2016-04-07	6.743	6.243	6.493
2016-04-08	5.628	5.128	5.378
2016-04-09	1.345	0.845	1.095
2016-04-10	2.475	1.975	2.225
2016-04-11	6.148	5.648	5.898
2016-04-12	8.189	7.689	7.939
2016-04-13	8.833	8.333	8.583
2016-04-14	6.754	6.254	6.504
2016-04-15	7.439	6.939	7.189
2016-04-16	8.787	8.287	8.537
2016-04-17	10.192	9.692	9.942
2016-04-18	9.558	9.058	9.308
2016-04-19	8.186	7.686	7.936
2016-04-20	7.955	7.455	7.705
2016-04-21	7.742	7.242	7.492
2016-04-22	8.762	8.262	8.512
2016-04-23	6.106	5.606	5.856
2016-04-24	4.542	4.042	4.292
2016-04-25	4.356	3.856	4.106
2016-04-26	5.156	4.656	4.906
2016-04-27	6.401	5.901	6.151
2016-04-28	7.527	7.027	7.277
2016-04-29	7.614	7.114	7.364
2016-04-30	7.074	6.574	6.824
2016-05-01	4.014	3.514	3.764
2016-05-02	2.347	1.847	2.097
2016-05-03	5.8	5.3	5.55
2016-05-04	7.605	7.105	7.355
2016-05-05	7.036	6.536	6.786
2016-05-06	7.425	6.925	7.175
2016-05-07	5.117	4.617	4.867
2016-05-08	6.204	5.704	5.954
2016-05-09	7.602	7.102	7.352
2016-05-10	10.841	10.341	10.591
2016-05-11	9.658	9.158	9.408
2016-05-12	8.638	8.138	8.388
2016-05-13	6.783	6.283	6.533
2016-05-14	5.147	4.647	4.897
2016-05-15	5.862	5.362	5.612
2016-05-16	6.045	5.545	5.795
2016-05-17	6.518	6.018	6.268
2016-05-18	7.858	7.358	7.608
2016-05-19	6.348	5.848	6.098
2016-05-20	6.898	6.398	6.648
2016-05-21	8.874	8.374	8.624
2016-05-22	10.047	9.547	9.797
2016-05-23	8.222	7.722	7.972
2016-05-24	7.197	6.697	6.947
2016-05-25	10.192	9.692	9.942
2016-05-26	12.506	12.006	12.256
2016-05-27	13.87	13.37	13.62
2016-05-28	13.452	12.952	13.202
2016-05-29	11.942	11.442	11.692
2016-05-30	10.67	10.17	10.42
2016-05-31	11.251	10.751	11.001
2016-06-01	10.256	9.756	10.006
2016-06-02	10.449	9.949	10.199
2016-06-03	10.865	10.365	10.615
2016-06-04	12.289	11.789	12.039
2016-06-05	12.262	11.762	12.012
2016-06-06	12.461	11.961	12.211
2016-06-07	13.008	12.508	12.758
2016-06-08	12.97	12.47	12.72
2016-06-09	13.041	12.541	12.791
2016-06-10	13.487	12.987	13.237
2016-06-11	14.594	14.094	14.344
2016-06-12	13.136	12.636	12.886
2016-06-13	12.426	11.926	12.176
2016-06-14	11.735	11.235	11.485
2016-06-15	14.503	14.003	14.253
2016-06-16	16.189	15.689	15.939
2016-06-17	12.227	11.727	11.977
2016-06-18	12.33	11.83	12.08
2016-06-19	10.017	9.517	9.767
2016-06-20	10.991	10.491	10.741
2016-06-21	12.543	12.043	12.293
2016-06-22	12.429	11.929	12.179
2016-06-23	14.96	14.46	14.71
2016-06-24	16.779	16.279	16.529
2016-06-25	17.083	16.583	16.833
2016-06-26	17.361	16.861	17.111
2016-06-27	15.728	15.228	15.478
2016-06-28	16.083	15.583	15.833
2016-06-29	17.482	16.982	17.232
2016-06-30	18.19	17.69	17.94
2016-07-01	17.7	17.2	17.45
2016-07-02	17.63	17.13	17.38
2016-07-03	17.924	17.424	17.674
2016-07-04	18.69	18.19	18.44
2016-07-05	18.281	17.781	18.031
2016-07-06	19.033	18.533	18.783
2016-07-07	18.5	18	18.25
2016-07-08	19.347	18.847	19.097
2016-07-09	20.158	19.658	19.908
2016-07-10	19.171	18.671	18.921
2016-07-11	20.173	19.673	19.923
2016-07-12	20.232	19.732	19.982
2016-07-13	19.594	19.094	19.344
2016-07-14	13.903	13.403	13.653
2016-07-15	12.827	12.327	12.577
2016-07-16	14.216	13.716	13.966
2016-07-17	16.006	15.506	15.756
2016-07-18	17.406	16.906	17.156
2016-07-19	18.676	18.176	18.426
2016-07-20	19.118	18.618	18.868
2016-07-21	19.832	19.332	19.582
2016-07-22	19.51	19.01	19.26
2016-07-23	20.03	19.53	19.78
2016-07-24	16.865	16.365	16.615
2016-07-25	15.79	15.29	15.54
2016-07-26	16.143	15.643	15.893
2016-07-27	16.708	16.208	16.458
2016-07-28	16.277	15.777	16.027
2016-07-29	17.538	17.038	17.288
2016-07-30	18.729	18.229	18.479
2016-07-31	19.642	19.142	19.392
2016-08-01	18.584	18.084	18.334
2016-08-02	17.748	17.248	17.498
2016-08-03	18.694	18.194	18.444
2016-08-04	19.404	18.904	19.154
2016-08-05	18.429	17.929	18.179
