# Supplementary material for: Predicting the consequences of global warming on Gentiana lutea germination at the edge of its distributional and ecological range
Source: PeerJ. 2020 May 6;8:e8894. doi: 10.7717/peerj.8894 (PMC7210811; doi:10.7717/peerj.8894)
Supplement: Supplemental Information 8 [file peerj-08-8894-s008.xlsx]

## Sheet: Thermal time
	Thermal time (°Cd)
Percentile	IS - C60	IS - C90	TM C-60	TM - C90
10	70.4225	103.093	52.6316	95.2381
20	50.2513	119.048	84.0336	92.5926
30	87.7193	117.647	88.4956	93.4579
40	95.2381	119.048	95.2381	99.0099
50	114.942	120.482	105.263	99.0099
60	125	129.87		105.263
70		135.135		112.36
80		156.25		126.582
90		169.492		151.515
